# Supplementary material for: Phenotypic and molecular basis of SIX1 variants linked to non-syndromic deafness and atypical branchio-otic syndrome in South Korea
Source: Springer Nature journal article supplement (doi:10.1038/s41598-023-38909-w), 2023-07-21
Supplement: MOESM1 [file 41598_2023_38909_MOESM1_ESM.pdf]

## Supplementary Information

### **Phenotypic and molecular basis of *SIX1* variants linked to non-syndromic deafness and atypical branchio-otic syndrome in South Korea**

Somin Lee<sup>1#</sup>, Yejin Yun<sup>1#</sup>, Ju Hyuen CHA<sup>1</sup>, Jin Hee Han<sup>2</sup>, Dae Hee Lee<sup>3</sup>, Jae-Jin Song<sup>2</sup>, Moo Kyun Park<sup>1</sup>, Jun Ho Lee<sup>1</sup>, Seung Ha Oh<sup>1</sup>, Byung Yoon Choi<sup>2\*</sup>, and Sang-Yeon Lee<sup>1,4,5\*</sup>

<sup>1</sup>Department of Otorhinolaryngology-Head and Neck Surgery, Seoul National University Hospital, Seoul National University College of Medicine, Seoul, South Korea

<sup>2</sup>Department of Otorhinolaryngology-Head and Neck Surgery, Seoul National University Bundang Hospital, South Korea

<sup>3</sup>CTCELLS, Inc., 21, Yuseong-daero, 1205beon-gil, Yuseong-gu, Daejeon, Rep.of Korea

<sup>4</sup>Department of Genomic Medicine, Seoul National University Hospital, Seoul, South Korea

<sup>5</sup>Sensory Organ Research Institute, Seoul National University Medical Research Center

#These authors contributed equally to this work.

\*These authors supervised equally to this work.

### **Corresponding author**

Sang-Yeon Lee

Department of Otorhinolaryngology-Head and Neck Surgery, Seoul National University College of Medicine

Department of Genomic Medicine, Precision Medicine & Rare Disease Center

Seoul National University Hospital, Jongno-Gu, Daehak-Ro, 101, Seoul, Korea

Tel: +82-10-3645-9715

E-mail: [maru4843@hanmail.net](mailto:maru4843@hanmail.net)

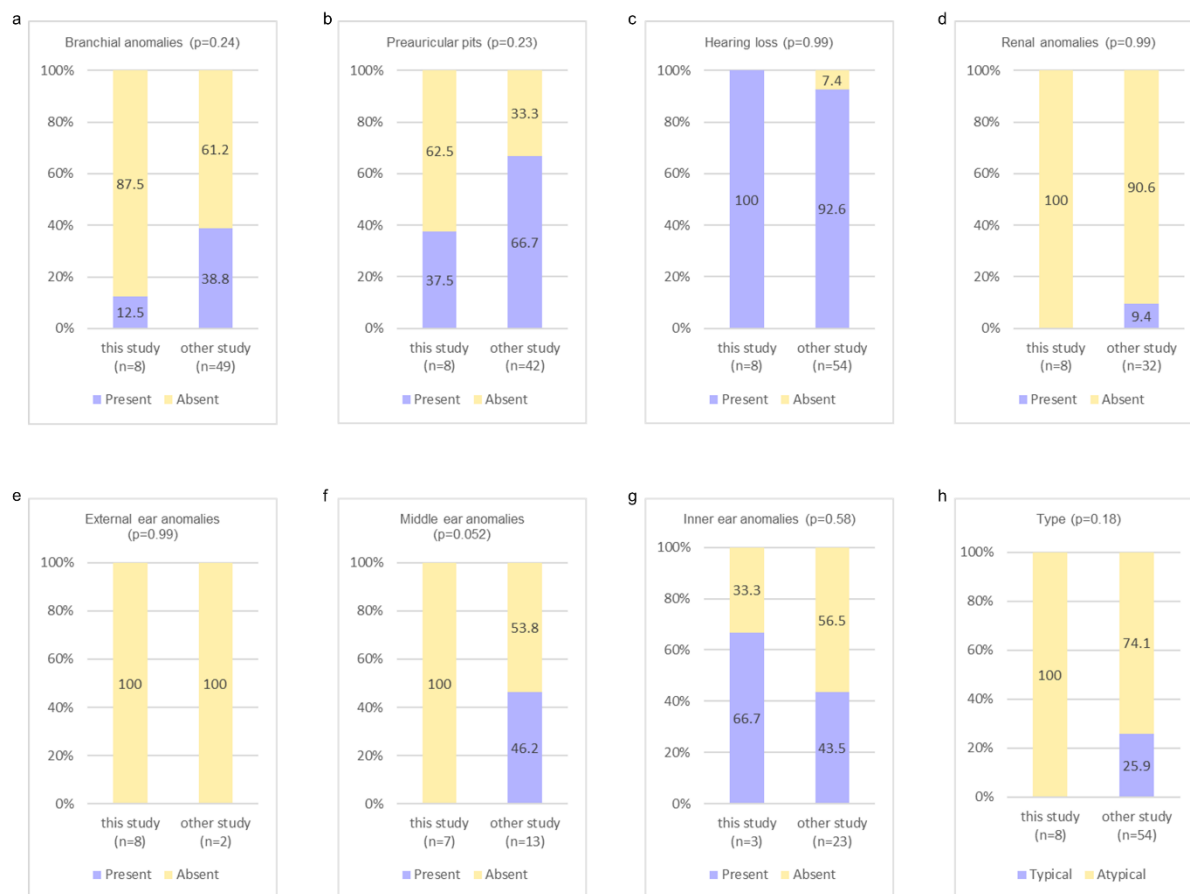

**Supplementary Figure S1. Comparison of statistics for each phenotype of the *SIX1* in this study versus those in other studies. No significant difference in the overall phenotypes was observed.**

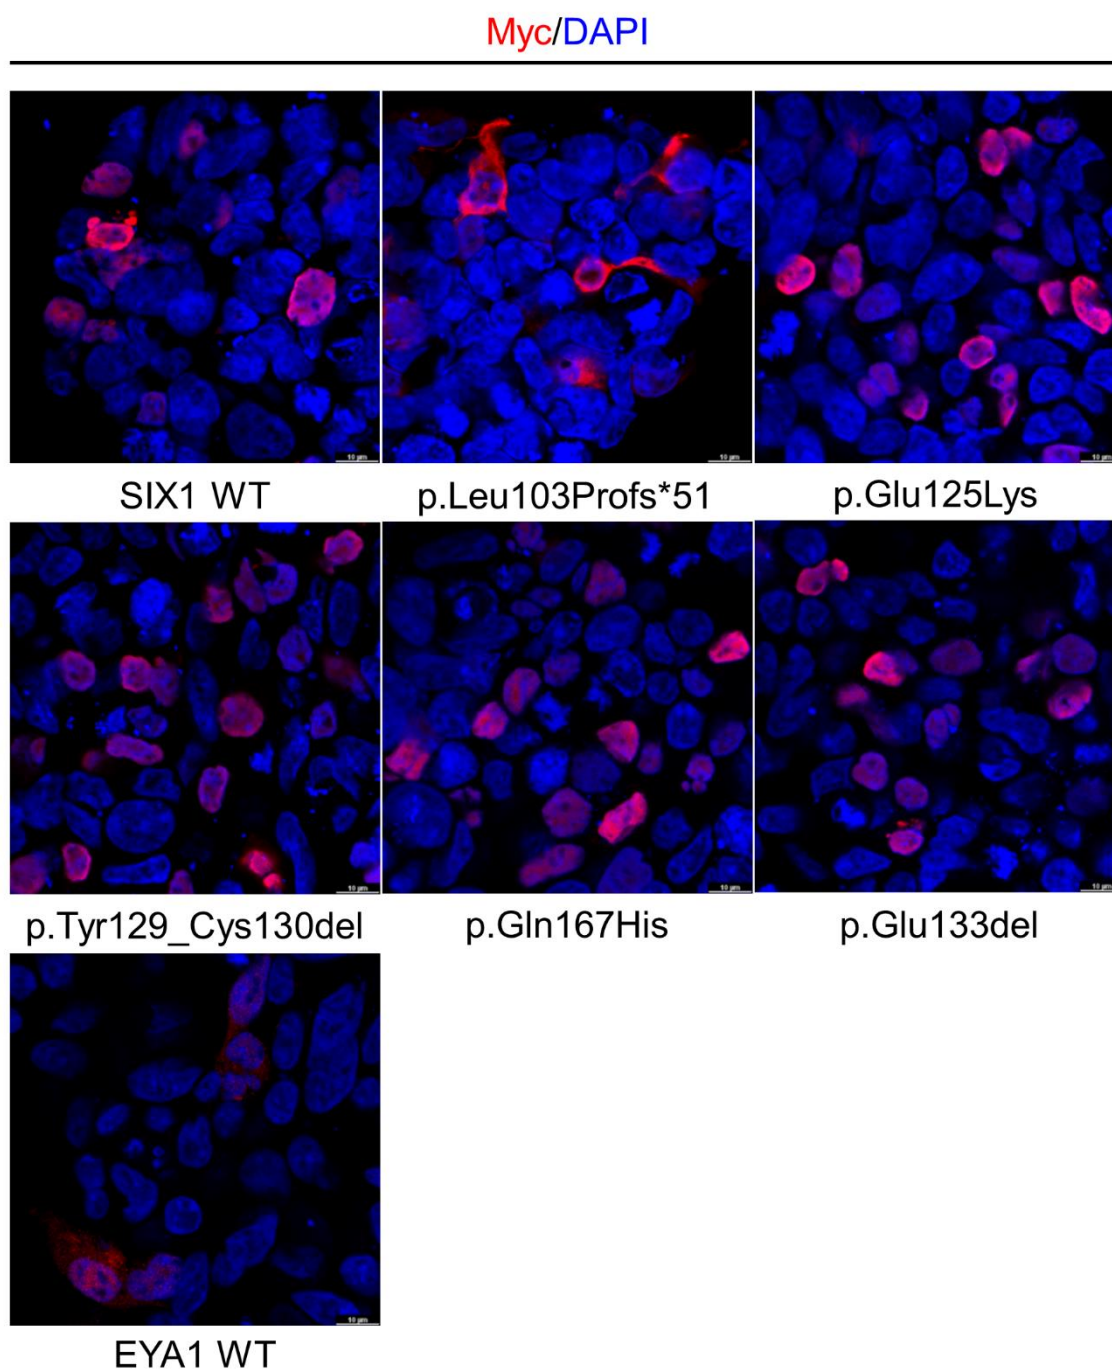

**Supplementary Figure S2. Subcellular localization of SIX1 wild-type and mutants.** Immunofluorescence of HEK293 cells single transfected with C-terminal Myc-DDK-tagged SIX1 wild-type, p.Leu103Pfs\*51, p.Glu125Lys, p.Tyr129\_Cys130del, p.Gln167His, p.Glu133del, and EYA1 wild-type. Except for the p.Leu103Profs\*51, all mutant SIX1 and wild-type proteins were localized in the nucleus, and full-length EYA1 was localized in the cytoplasm.

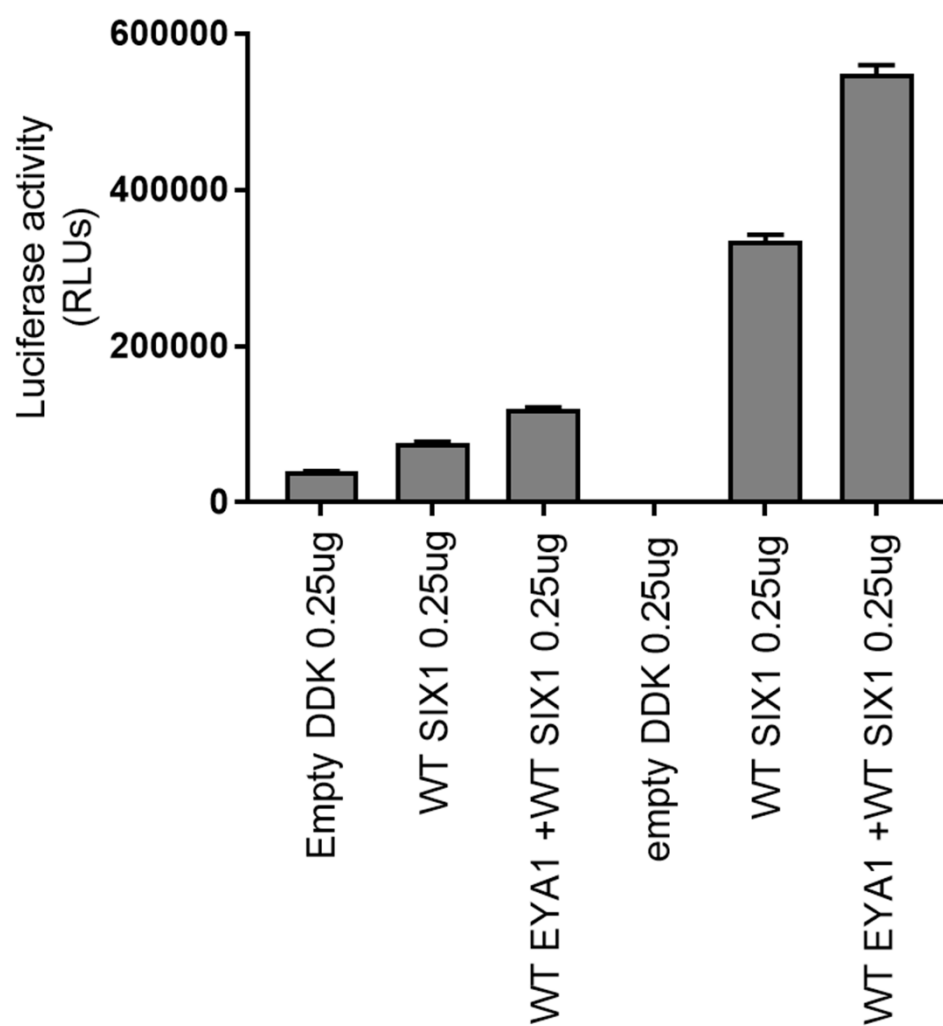

**Supplementary Figure S3. Optimization of efficiency to measure the transcriptional activity of SIX1 wild-type.** To minimize the ceiling effect, we used the luciferase system with the highest efficiency at a concentration of 0.25  $\mu$ g of the MYOG-6xMEF3-luc plasmid.

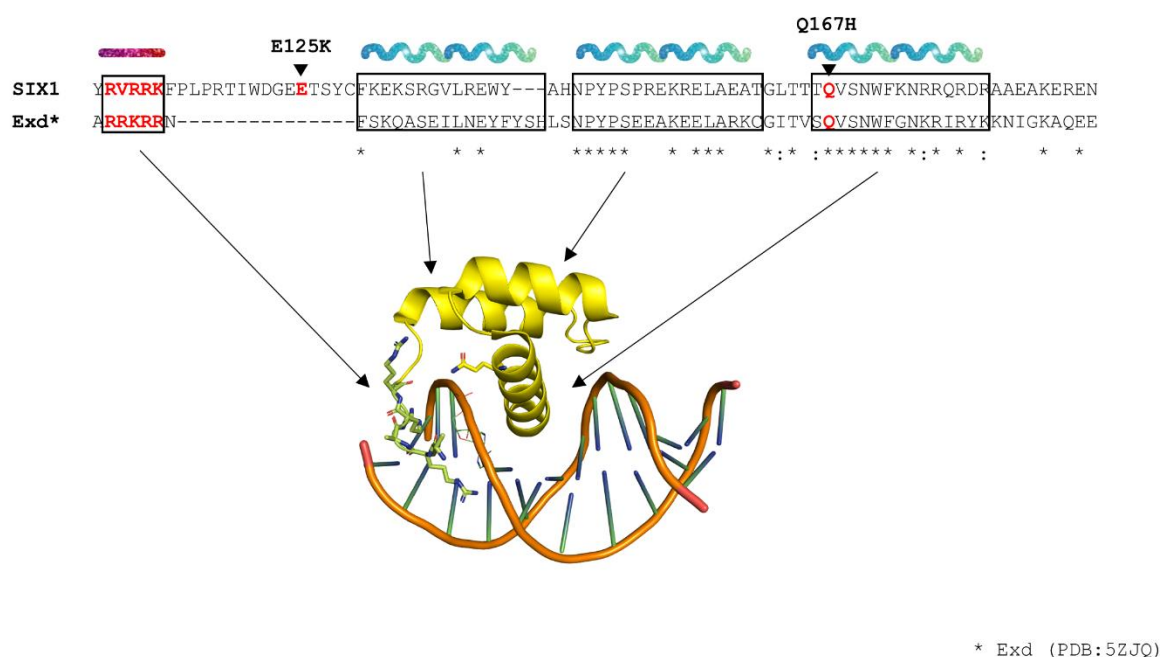

**Supplementary Figure S4. Distinct structural characteristics of the SIX1 HD domain.** The SIX1 HD domain is characterized by a gap of over 12 amino acids between the end of the basic loop (p.Lys114) and the beginning of the first helix (p.Phe131).

Figure 4

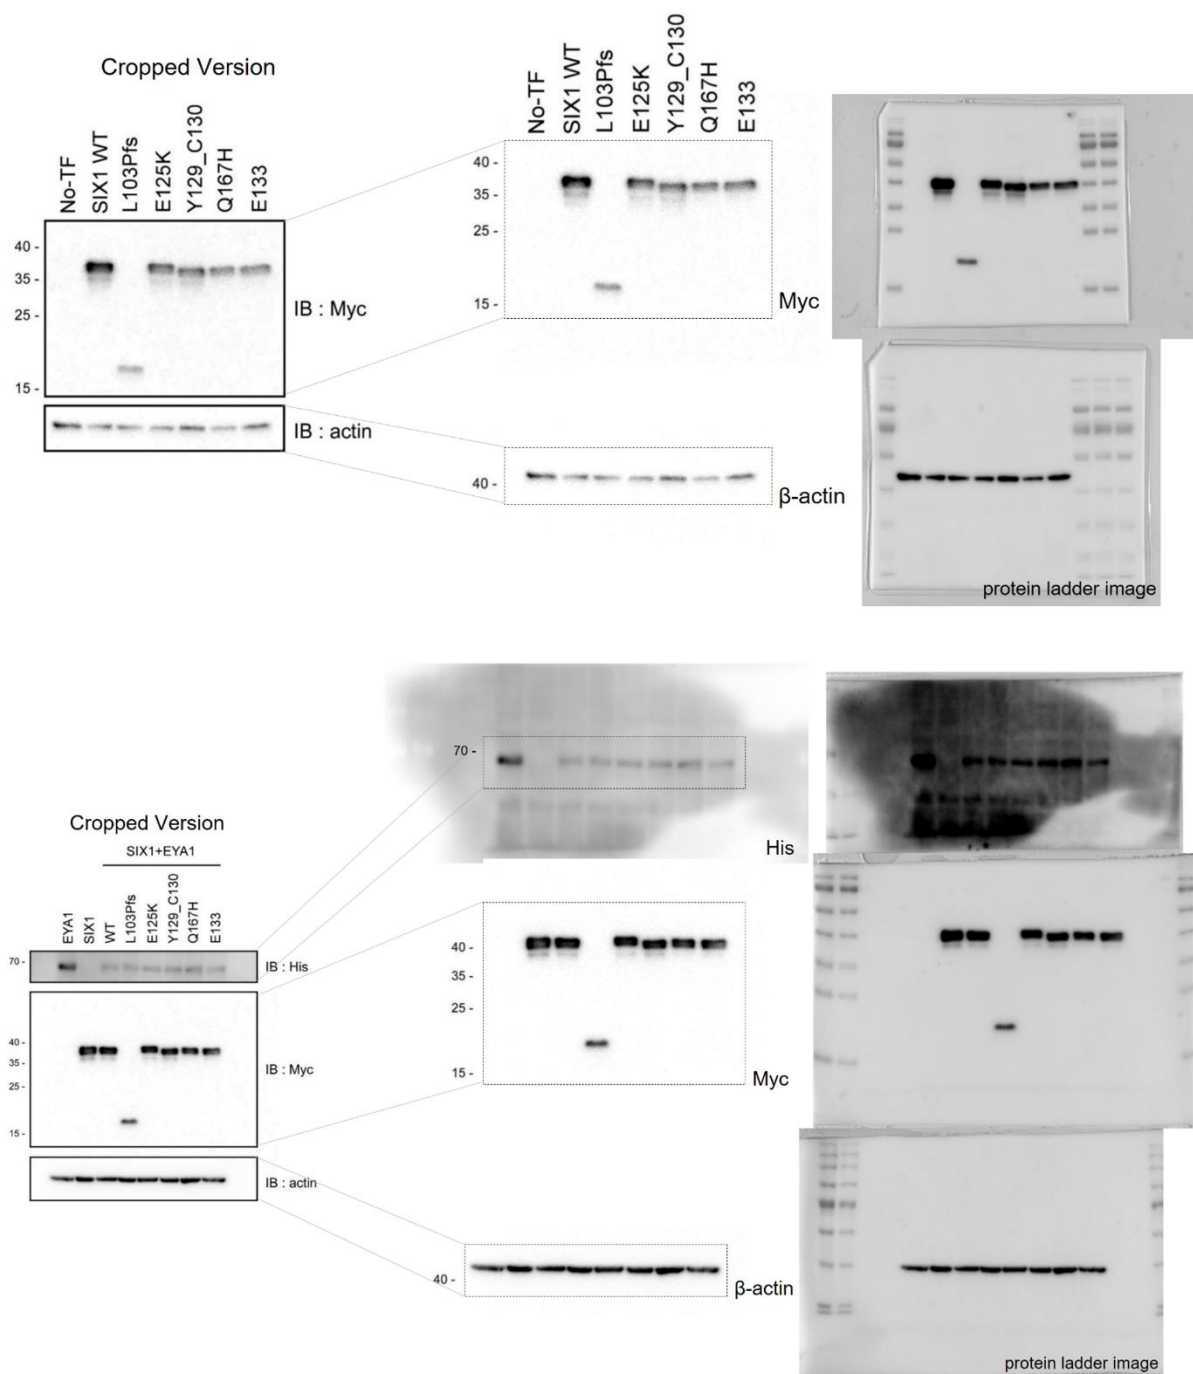

Supplementary Figure S5. Original blots of Fig. 4

Original images for Figure 6

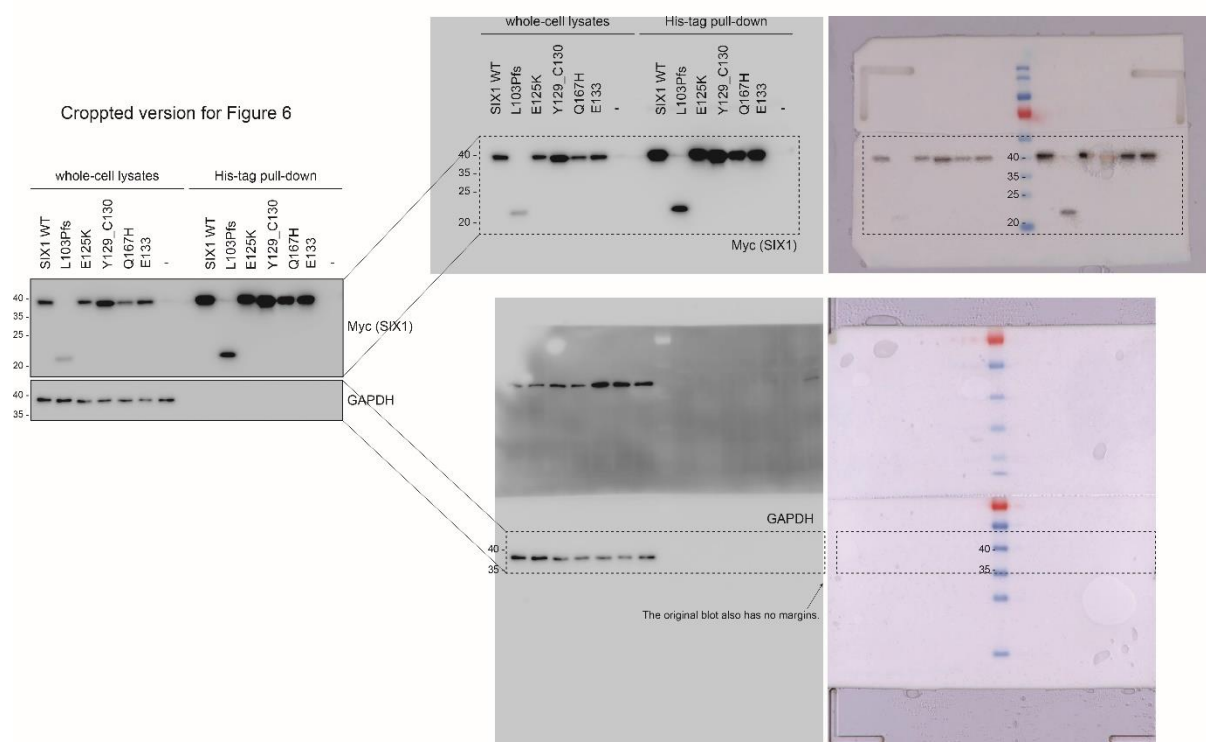

Supplementary Figure S6. Original blots of Fig. 6

Original images for Figure 7

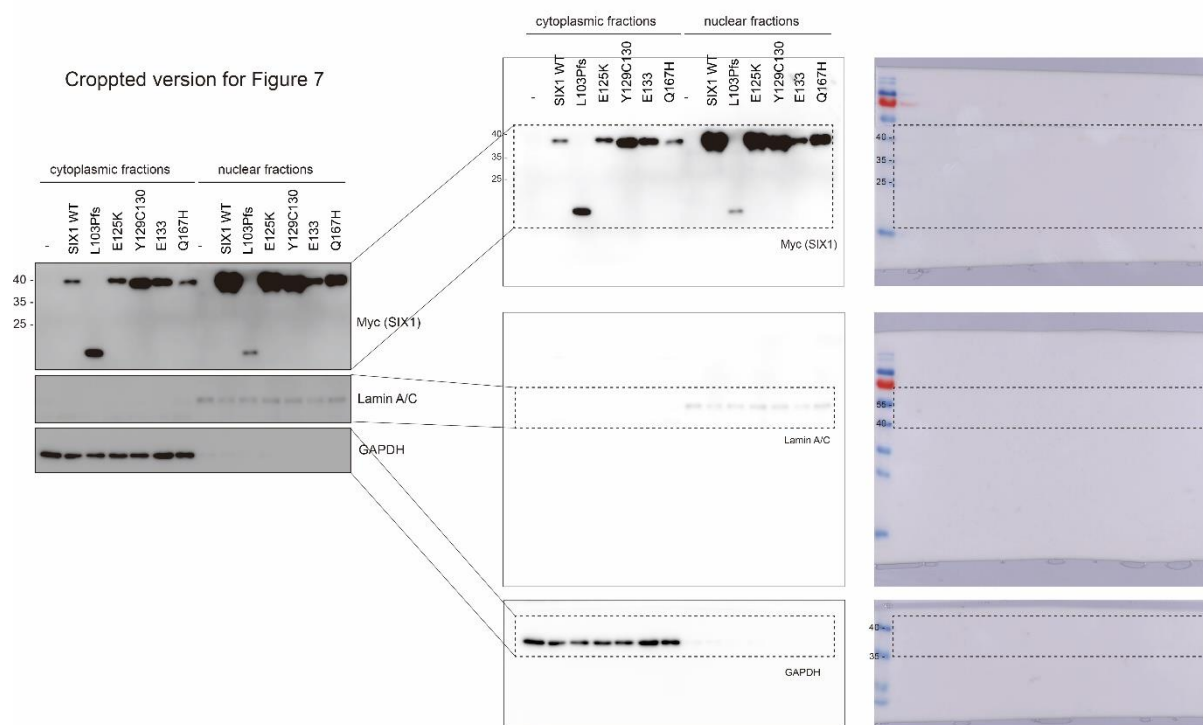

Supplementary Figure S7. Original blots of Fig. 7



**Supplementary Table 1. Detailed clinical features of *SIX1* according to criteria BOR/BO syndrome.**

| Family ID. | Gene        | Variant                         | Branchial anomalies | Preauricular pits | Hearing loss | Renal anomalies | External ear anomalies | Middle ear anomalies | Inner ear anomalies | Typical vs. Atypical*          | Reference             |
|------------|-------------|---------------------------------|---------------------|-------------------|--------------|-----------------|------------------------|----------------------|---------------------|--------------------------------|-----------------------|
| 22260      | <i>SIX1</i> | c.50T>A:p.Val17Glu              | 1/1                 | 0/1               | 1/1          | 0/1             | N/A                    | N/A                  | N/A                 | Atypical 1/1                   | Kochhar et al. 2008   |
| 21870      | <i>SIX1</i> | c.218A>C:p.His73Pro             | 2/2                 | 0/2               | 1/2          | 0/2             | N/A                    | N/A                  | N/A                 | Atypical 2/2                   | Kochhar et al. 2008   |
| SB468-909  | <i>SIX1</i> | c.307dupC:p.Leu103ProfsTer51    | 0/1                 | 0/1               | 1/1          | 0/1             | 0/1                    | 0/1                  | N/A                 | Atypical 1/1                   | this study            |
| 20050      | <i>SIX1</i> | c.317T>G:p.Val106Gly            | 0/1                 | 1/1               | 1/1          | N/A             | N/A                    | N/A                  | N/A                 | Atypical 1/1                   | Kochhar et al. 2008   |
| K6/7       | <i>SIX1</i> | c.328C>T:p.Arg110Trp            | 1/1                 | 1/1               | 1/1          | 0/1             | N/A                    | N/A                  | N/A                 | Typical 1/1                    | Ruf et al. 2004       |
| S2120      | <i>SIX1</i> | c.328C>T:p.Arg110Trp            | 1/1                 | 1/1               | 1/1          | N/A             | N/A                    | N/A                  | N/A                 | Typical 1/1                    | Ruf et al. 2004       |
| 2221       | <i>SIX1</i> | c.328C>T:p.Arg110Trp            | 8/12                | 12/12             | 12/12        | 1/7             | N/A                    | 6/8                  | 8/8                 | Typical 9/13<br>Atypical 4/13  | Ceruti et al. 2002    |
| 2440       | <i>SIX1</i> | c.328C>T:p.Arg110Trp            | N/A                 | N/A               | 1/1          | N/A             | N/A                    | N/A                  | N/A                 | Atypical 1/1                   | Kochhar et al. 2008   |
| 20540      | <i>SIX1</i> | c.328C>T:p.Arg110Trp            | 1/1                 | 0/1               | 1/1          | N/A             | N/A                    | N/A                  | N/A                 | Atypical 1/1                   | Kochhar et al. 2008   |
| 21480      | <i>SIX1</i> | c.329G>A:Arg110Gln              | 0/1                 | 1/1               | 1/1          | 0/1             | N/A                    | N/A                  | N/A                 | Atypical 1/1                   | Kochhar et al. 2008   |
| 20800      | <i>SIX1</i> | c.334C>T:p.Arg112Cys            | 1/1                 | 0/1               | 1/1          | 0/1             | N/A                    | N/A                  | N/A                 | Atypical 1/1                   | Kochhar et al. 2008   |
| Family 2   | <i>SIX1</i> | c.364T>A:p.Trp122Arg            | 1/11                | 5/11              | 14/15        | 0/3             | N/A                    | 0/3                  | 2/3                 | Typical 1/14<br>Atypical 13/14 | Sanggaard et al. 2007 |
| SB940      | <i>SIX1</i> | c.373G>A:p.Glu125Lys            | 0/2                 | 0/2               | 2/2          | 0/2             | 0/2                    | 0/2                  | 1/1                 | Atypical 2/2                   | this study            |
| KH         | <i>SIX1</i> | c.373G>A:p.Glu125Lys            | 0/5                 | 4/5               | 5/5          | 0/4             | N/A                    | N/A                  | 0/3                 | Atypical 5/5                   | Mosrati et al. 2011   |
| F1038      | <i>SIX1</i> | c.386A>G:p.Tyr129Cys            | 1/1                 | 1/1               | 1/1          | 0/1             | N/A                    | N/A                  | N/A                 | Typical 1/1                    | Ruf et al. 2004       |
| Ito1       | <i>SIX1</i> | c.386A>G:p.Tyr129Cys            | 0/1                 | 1/1               | 1/1          | 0/1             | N/A                    | N/A                  | N/A                 | Atypical 1/1                   | Ito et al. 2006       |
| P-D26      | <i>SIX1</i> | c.385T>C:p.Tyr129His            | 0/7                 | N/A               | 7/7          | 0/7             | N/A                    | N/A                  | 0/7                 | Atypical 7/7                   | Hong et al.2021       |
| SH693      | <i>SIX1</i> | c.386_391del:p.Tyr129_Cys130del | 0/2                 | 2/2               | 2/2          | 0/2             | 0/2                    | 0/2                  | N/A                 | Atypical 2/2                   | this study            |
| SH613      | <i>SIX1</i> | c.397_399del:p.Glu133del        | 0/1                 | 1/1               | 1/1          | 0/1             | 0/1                    | 0/1                  | 1/1                 | Atypical 1/1                   | this study            |

|       |             |                          |     |     |     |     |     |     |     |              |                  |
|-------|-------------|--------------------------|-----|-----|-----|-----|-----|-----|-----|--------------|------------------|
| F1120 | <i>SIX1</i> | c.397_399del:p.Glu133del | 1/1 | 0/1 | 1/1 | 1/1 | N/A | N/A | N/A | Typical 1/1  | Ruf et al. 2004  |
| SH529 | <i>SIX1</i> | c.501G>C:p.Gln167His     | 1/2 | 0/2 | 2/2 | 0/2 | 0/2 | 0/1 | 0/1 | Atypical 2/2 | this study       |
| 1226  | <i>SIX1</i> | c.560+3A>T               | 1/1 | 1/1 | 0/1 | 0/1 | 0/1 | 0/1 | 0/1 | Atypical 1/1 | Krug et al. 2010 |
| 162   | <i>SIX1</i> | c.746C>T:p.Pro249Leu     | 0/1 | 0/1 | 0/1 | 1/1 | 0/1 | 0/1 | 0/1 | Atypical 1/1 | Krug et al. 2010 |

*SIX1*, canonical transcript NM\_005982.4; Abbreviations: N/A, not available.

\*Note, If the observed symptoms do not match the predefined requirements for a diagnosis of BOR/BO syndrome, specifically either at least three major criteria or a combination of two major and two minor ones, then the condition can be classified as a atypical BOR/BO syndrome.
